# Supplementary material for: The Effect of COVID-19 on Middle-Aged Adults’ Mental Health: A Mixed-Method Case–Control Study on the Moderating Effect of Cognitive Reserve
Source: MDPI journal article supplement (doi:10.3390/healthcare12020163), 2024-01-10
Supplement: s1 [file s1]

**Table S1.** Description of LIWC categories used in the study with examples of the words belonging to each category and examples of previous relevant studies.

| Category                                                                                                        | Examples      | Examples of previous relevant studies that used this category                                                                                                                                                                                                                                                                                                                                                                                                                                                                               |
|-----------------------------------------------------------------------------------------------------------------|---------------|---------------------------------------------------------------------------------------------------------------------------------------------------------------------------------------------------------------------------------------------------------------------------------------------------------------------------------------------------------------------------------------------------------------------------------------------------------------------------------------------------------------------------------------------|
| <u>Comprehensive categories</u><br>Sub-categories                                                               |               |                                                                                                                                                                                                                                                                                                                                                                                                                                                                                                                                             |
| <u>Summary Language Variables</u><br><br><u>(Studies quoted here used all the sub- categories listed below)</u> |               | Lumontod III, R. Z. (2020). Seeing the invisible: Extracting signs of depression and suicidal ideation from college students' writing using LIWC a computerized text analysis. <i>Int. J. Res. Stud. Educ</i> , 9, 31-44.<br><br>Low, D. M., Rumker, L., Talkar, T., Torous, J., Cecchi, G., & Ghosh, S. S. (2020). Natural language processing reveals vulnerable mental health support groups and heightened health anxiety on reddit during covid-19: Observational study. <i>Journal of medical Internet research</i> , 22(10), e22635. |
| Analytical Thinking                                                                                             | /             |                                                                                                                                                                                                                                                                                                                                                                                                                                                                                                                                             |
| Clout                                                                                                           | /             |                                                                                                                                                                                                                                                                                                                                                                                                                                                                                                                                             |
| Emotional tone                                                                                                  | /             |                                                                                                                                                                                                                                                                                                                                                                                                                                                                                                                                             |
| <u>Linguistic dimensions</u><br><br><u>(Studies quoted here used all the sub- categories listed below)</u>      |               | Lumontod III, R. Z. (2020). Seeing the invisible: Extracting signs of depression and suicidal ideation from college students' writing using LIWC a computerized text analysis. <i>Int. J. Res. Stud. Educ</i> , 9, 31-44.                                                                                                                                                                                                                                                                                                                   |
| Personal pronouns                                                                                               | I, them, her  |                                                                                                                                                                                                                                                                                                                                                                                                                                                                                                                                             |
| 1 <sup>st</sup> person singular                                                                                 | I, me, mine   | Robertson, S. M., Short, S. D., Sawyer, L., & Sweazy, S. (2021). Randomized controlled trial assessing the efficacy of expressive writing in reducing anxiety in first-year college students: the role of linguistic features. <i>Psychology &amp; health</i> , 36(9), 1041-1065.                                                                                                                                                                                                                                                           |
| 3 <sup>rd</sup> person singular                                                                                 | she, her, him |                                                                                                                                                                                                                                                                                                                                                                                                                                                                                                                                             |
| <u>Psychological processes</u><br><br><u>(Studies quoted here used all the sub- categories listed below)</u>    |               | Lumontod III, R. Z. (2020). Seeing the invisible: Extracting signs of depression and suicidal ideation from college students' writing using LIWC a computerized text analysis. <i>Int. J. Res. Stud. Educ</i> , 9, 31-44.<br><br>Low, D. M., Rumker, L., Talkar, T., Torous, J., Cecchi, G., & Ghosh, S. S. (2020). Natural language processing reveals vulnerable mental health support groups and heightened health anxiety on reddit during covid-19:                                                                                    |

|                     |                             |                                                                                                                                                                                                                                                                                                                                                                                                                                                                                                                                                                  |
|---------------------|-----------------------------|------------------------------------------------------------------------------------------------------------------------------------------------------------------------------------------------------------------------------------------------------------------------------------------------------------------------------------------------------------------------------------------------------------------------------------------------------------------------------------------------------------------------------------------------------------------|
|                     |                             | <p>Observational study. <i>Journal of medical Internet research</i>, 22(10), e22635.</p> <p>Varma, P., Burge, M., Meaklim, H., Junge, M., &amp; Jackson, M. L. (2021). Poor sleep quality and its relationship with individual characteristics, personal experiences and mental health during the COVID-19 pandemic. <i>International journal of environmental research and public health</i>, 18(11), 6030.</p>                                                                                                                                                 |
| Affective processes | Happy, cried                | <p>Jelinek, L., Stockbauer, C., Randjbar, S., Kellner, M., Ehring, T., &amp; Moritz, S. (2010). Characteristics and organization of the worst moment of trauma memories in posttraumatic stress disorder. <i>Behaviour Research and Therapy</i>, 48(7), 680-685.</p> <p>Robertson, S. M., Short, S. D., Sawyer, L., &amp; Sweazy, S. (2021). Randomized controlled trial assessing the efficacy of expressive writing in reducing anxiety in first-year college students: the role of linguistic features. <i>Psychology &amp; health</i>, 36(9), 1041-1065.</p> |
| Positive emotion    | Love, nice, sweet           | <p>Tov, W., Ng, K. L., Lin, H., &amp; Qiu, L. (2013). Detecting well-being via computerized content analysis of brief diary entries. <i>Psychological assessment</i>, 25(4), 1069.</p> <p>Desrosiers, A., Vine, V., &amp; Kershaw, T. (2019). "RU Mad?": Computerized text analysis of affect in social media relates to stress and substance use among ethnic minority emerging adult males. <i>Anxiety, Stress, &amp; Coping</i>, 32(1), 109-123.</p>                                                                                                          |
| Negative emotion    | Hurt, ugly, nasty           | <p>Tov, W., Ng, K. L., Lin, H., &amp; Qiu, L. (2013). Detecting well-being via computerized content analysis of brief diary entries. <i>Psychological assessment</i>, 25(4), 1069.</p> <p>Desrosiers, A., Vine, V., &amp; Kershaw, T. (2019). "RU Mad?": Computerized text analysis of affect in social media relates to stress and substance use among ethnic minority emerging adult males. <i>Anxiety, Stress, &amp; Coping</i>, 32(1), 109-123.</p>                                                                                                          |
| Social processes    | Mate, talk, daughter, buddy |                                                                                                                                                                                                                                                                                                                                                                                                                                                                                                                                                                  |
| Cognitive processes | Cause, know, ought          | Jelinek, L., Stockbauer, C., Randjbar, S., Kellner, M., Ehring, T., & Moritz, S. (2010).                                                                                                                                                                                                                                                                                                                                                                                                                                                                         |

|                                                                                                           |                   |                                                                                                                                                                                                                                                                                                            |
|-----------------------------------------------------------------------------------------------------------|-------------------|------------------------------------------------------------------------------------------------------------------------------------------------------------------------------------------------------------------------------------------------------------------------------------------------------------|
|                                                                                                           |                   | Characteristics and organization of the worst moment of trauma memories in posttraumatic stress disorder. <i>Behaviour Research and Therapy</i> , 48(7), 680-685.                                                                                                                                          |
| <i>Biological processes</i><br><br><i>(Studies quoted here used all the sub- categories listed below)</i> | Eat, blood, pain  | Low, D. M., Rumker, L., Talkar, T., Torous, J., Cecchi, G., & Ghosh, S. S. (2020). Natural language processing reveals vulnerable mental health support groups and heightened health anxiety on reddit during covid-19: Observational study. <i>Journal of medical Internet research</i> , 22(10), e22635. |
| Health                                                                                                    | Clinic, flu, pill |                                                                                                                                                                                                                                                                                                            |
| <i>Time orientation</i><br><br><i>(Studies quoted here used all the sub- categories listed below)</i>     |                   | Jelinek, L., Stockbauer, C., Randjbar, S., Kellner, M., Ehring, T., & Moritz, S. (2010). Characteristics and organization of the worst moment of trauma memories in posttraumatic stress disorder. <i>Behaviour Research and Therapy</i> , 48(7), 680-685.                                                 |
| Past focus                                                                                                | Ago, did, talked  |                                                                                                                                                                                                                                                                                                            |
| Present Focus                                                                                             | Today, is, now    |                                                                                                                                                                                                                                                                                                            |
| Future Focus                                                                                              | May, will, soon   |                                                                                                                                                                                                                                                                                                            |

**Table S2.** Follow up regression models follow-up models with added predictors (IES and DASS scores).

|                          | <b><math>\beta</math> Coefficient</b> | <b><i>p</i></b> | <b>95% CI</b> |
|--------------------------|---------------------------------------|-----------------|---------------|
| <i>General Affect</i>    |                                       |                 |               |
| Cognitive Reserve        | -.23                                  | <.001           | -.30 – -.15   |
| IES total score          | -.08                                  | .004            | -.14 – -.03   |
| DAAS Depression          | .28                                   | .006            | .08 – .48     |
| DAAS Anxiety             | -.96                                  | <.001           | -1.24 – -.67  |
| DAAS stress              | .58                                   | <.001           | .45 – .70     |
| <i>Positive Emotions</i> |                                       |                 |               |
| Cognitive Reserve        | -.07                                  | <.001           | -.08 – -.07   |
| IES total score          | -.08                                  | <.001           | -.08 – -.07   |
| DAAS Depression          | -.21                                  | <.001           | -.23 – -.19   |
| DAAS Anxiety             | .23                                   | <.001           | .21 – .26     |
| DAAS stress              | -.04                                  | <.001           | -.06 – -.03   |
| <i>Negative Emotions</i> |                                       |                 |               |
| Cognitive Reserve        | -.22                                  | <.001           | -.30 – -.14   |
| IES total score          | -.02                                  | .51             | -.07 – .04    |
| DAAS Depression          | .66                                   | <.001           | .46 – .86     |
| DAAS Anxiety             | -1.23                                 | <.001           | -1.52 – -.95  |
| DAAS stress              | .31                                   | <.001           | .18 – .43     |
| <i>Anxiety</i>           |                                       |                 |               |
| Cognitive Reserve        | .17                                   | <.001           | .15 – .19     |
| IES total score          | .14                                   | <.001           | .12 – .15     |
| DAAS Depression          | -.24                                  | <.001           | -.29 – -.18   |
| DAAS Anxiety             | .18                                   | <.001           | .10 – .26     |
| DAAS stress              | .11                                   | <.001           | .08 – .15     |
| <i>Sadness</i>           |                                       |                 |               |
| Cognitive Reserve        | -.09                                  | <.001           | -.12 – -.06   |
| IES total score          | -.01                                  | .62             | -.03 – .02    |
| DAAS Depression          | .07                                   | .06             | -.01 – .15    |
| DAAS Anxiety             | -.31                                  | <.001           | -.42 – -.20   |
| DAAS stress              | .29                                   | <.001           | .24 – .34     |
| <i>Affiliation</i>       |                                       |                 |               |
| Cognitive Reserve        | .11                                   | <.001           | .06 – .16     |
| IES total score          | -.18                                  | <.001           | -.22 – -.14   |
| DAAS Depression          | .12                                   | .07             | -.02 – .26    |
| DAAS Anxiety             | .36                                   | <.001           | .16 – .55     |
| DAAS stress              | -.10                                  | .02             | -.19 – -.02   |
| <i>Achievement</i>       |                                       |                 |               |

|                             |      |       |             |
|-----------------------------|------|-------|-------------|
| Cognitive Reserve           | .21  | <.001 | .19 – .22   |
| IES total score             | .10  | <.001 | .09 – .11   |
| DAAS Depression             | -.50 | <.001 | -.54 – -.46 |
| DAAS Anxiety                | .60  | <.001 | .54 – .67   |
| DAAS stress                 | .19  | <.001 | .16 – .21   |
| <i>Reward</i>               |      |       |             |
| Cognitive Reserve           | -.14 | <.001 | -.17 – -.11 |
| IES total score             | -.22 | <.001 | -.24 – -.20 |
| DAAS Depression             | .43  | <.001 | .35 – .50   |
| DAAS Anxiety                | -.22 | <.001 | -.32 – -.11 |
| DAAS stress                 | -.21 | <.001 | -.26 – -.16 |
| <i>Risk taking</i>          |      |       |             |
| Cognitive Reserve           | .08  | <.001 | .06 – .09   |
| IES total score             | .04  | <.001 | .02 – .04   |
| DAAS Depression             | -.41 | <.001 | -.44 – -.38 |
| DAAS Anxiety                | .63  | <.001 | .58 – .68   |
| DAAS stress                 | -.03 | .01   | -.05 – -.01 |
| <i>Focus on the past</i>    |      |       |             |
| Cognitive Reserve           | -.09 | <.001 | -.11 – -.08 |
| IES total score             | -.06 | <.001 | -.07 – -.05 |
| DAAS Depression             | .04  | .01   | .01 – .07   |
| DAAS Anxiety                | -.10 | <.001 | -.14 – -.05 |
| DAAS stress                 | -.07 | <.001 | -.09 – -.05 |
| <i>Focus on the present</i> |      |       |             |
| Cognitive Reserve           | .11  | .01   | .04 – .19   |
| IES total score             | -.01 | .80   | -.06 – .05  |
| DAAS Depression             | .15  | .13   | -.05 – .35  |
| DAAS Anxiety                | -.10 | .47   | -.39 – .18  |
| DAAS stress                 | .03  | .60   | -.09 – .16  |
| <i>Focus on the future</i>  |      |       |             |
| Cognitive Reserve           | .53  | <.001 | .50 – .56   |
| IES total score             | .07  | <.001 | .05 – .09   |
| DAAS Depression             | -.40 | <.001 | -.48 – -.33 |
| DAAS Anxiety                | 1.44 | <.001 | 1.34 – 1.55 |
| DAAS stress                 | -.50 | <.001 | -.55 – -.45 |
